# Supplementary material for: Familial risk and illness burden jointly shape prefrontal hypoactivation in depression: An fNIRS study
Source: Research Square preprint supplement (doi:10.21203/rs.3.rs-8537776/v1), 2026-01-25
Supplement: Supplementary file 1 [file a0c3e06adf25b09c617df735.docx]

**Familial risk and illness burden jointly shape prefrontal hypoactivation in depression: An fNIRS study**

Bella Bingbing Zhang1, Sharie Xiao Wang1, Vera Wai Man Lam1, Rebecca Laidi Kan1, Nancy Manxinyu Shi, Tim Tianze Lin, Minxia Jin1,2, Adam Weili Xia1, Penny Ping Qin1, Tifei Yuan3, Georg S. Kranz1,3,4

*1Department of Rehabilitation Sciences, The Hong Kong Polytechnic University, Hong Kong SAR, China*

*2Shanghai YangZhi Rehabilitation Hospital (Shanghai Sunshine Rehabilitation Center), School of Medicine, Tongji University, Shanghai, China*

*3Shanghai Mental Health Center, Shanghai Jiao Tong University School of Medicine, Shanghai, China*

*4Mental Health Research Center (MHRC), The Hong Kong Polytechnic University, Hong Kong, China*

*5University Research Facility in Behavioral and Systems Neuroscience (UBSN), The Hong Kong Polytechnic University, Hong Kong, China*

**This file includes:**

Table S1

Table S1. MNI coordinates of each channel’s midpoint and the estimated corresponding BA area for each channel.

| **Channel number** | **MNI coordinate** | | | **Brodmann area** | **Estimated probability** |
| --- | --- | --- | --- | --- | --- |
|  | **X** | **Y** | **Z** |  |  |
| CH01 | 62.333 | -42.333 | 49.667 | 40 - Supramarginal gyrus part of Wernicke's area | 1 |
|  |  |  |  |  |  |
| CH02 | 60.333 | -13.667 | 50.667 | 4 - Primary Motor Cortex | 0.394 |
|  |  |  |  | 3 - Primary Somatosensory Cortex | 0.344 |
|  |  |  |  | 6 - Pre-Motor and Supplementary Motor Cortex | 0.151 |
|  |  |  |  | 1 - Primary Somatosensory Cortex | 0.112 |
|  |  |  |  |  |  |
| CH03 | 50 | 13.333 | 51.333 | 9 - Dorsolateral prefrontal cortex | 0.612 |
|  |  |  |  | 6 - Pre-Motor and Supplementary Motor Cortex | 0.376 |
|  |  |  |  | 44 - pars opercularis, part of Broca's area | 0.012 |
|  |  |  |  |  |  |
| CH04 | 31.333 | 34.333 | 52.333 | 9 - Dorsolateral prefrontal cortex | 0.642 |
|  |  |  |  | 8 - Includes Frontal eye fields | 0.358 |
|  |  |  |  |  |  |
| CH05 | 9 | 47 | 53 | 9 - Dorsolateral prefrontal cortex | 0.687 |
|  |  |  |  | 8 - Includes Frontal eye fields | 0.313 |
|  |  |  |  |  |  |
| CH06 | -15.667 | 45.667 | 50.333 | 9 - Dorsolateral prefrontal cortex | 0.893 |
|  |  |  |  | 8 - Includes Frontal eye fields | 0.107 |
|  |  |  |  |  |  |
| CH07 | -37.667 | 31.667 | 48 | 9 - Dorsolateral prefrontal cortex | 0.919 |
|  |  |  |  | 8 - Includes Frontal eye fields | 0.045 |
|  |  |  |  | 46 - Dorsolateral prefrontal cortex | 0.022 |
|  |  |  |  | 45 - pars triangularis Broca's area | 0.009 |
|  |  |  |  | 44 - pars opercularis, part of Broca's area | 0.004 |
|  |  |  |  |  |  |
| CH08 | -51 | 11.667 | 46.667 | 6 - Pre-Motor and Supplementary Motor Cortex | 0.457 |
|  |  |  |  | 9 - Dorsolateral prefrontal cortex | 0.358 |
|  |  |  |  | 44 - pars opercularis, part of Broca's area | 0.185 |
|  |  |  |  |  |  |
| CH09 | -60.333 | -13.667 | 46.667 | 3 - Primary Somatosensory Cortex | 0.357 |
|  |  |  |  | 4 - Primary Motor Cortex | 0.307 |
|  |  |  |  | 1 - Primary Somatosensory Cortex | 0.213 |
|  |  |  |  | 6 - Pre-Motor and Supplementary Motor Cortex | 0.087 |
|  |  |  |  | 43 - Subcentral area | 0.036 |
|  |  |  |  |  |  |
| CH10 | -62.667 | -35.667 | 48.333 | 40 - Supramarginal gyrus part of Wernicke's area | 0.806 |
|  |  |  |  | 2 - Primary Somatosensory Cortex | 0.162 |
|  |  |  |  | 1 - Primary Somatosensory Cortex | 0.032 |
|  |  |  |  |  |  |
| CH11 | 64.333 | -53.333 | 33 | 40 - Supramarginal gyrus part of Wernicke's area | 0.413 |
|  |  |  |  | 22 - Superior Temporal Gyrus | 0.302 |
|  |  |  |  | 39 - Angular gyrus, part of Wernicke's area | 0.252 |
|  |  |  |  | 48 - Retrosubicular area | 0.034 |
|  |  |  |  |  |  |
| CH12 | 69.667 | -23 | 34.333 | 2 - Primary Somatosensory Cortex | 0.731 |
|  |  |  |  | 1 - Primary Somatosensory Cortex | 0.215 |
|  |  |  |  | 40 - Supramarginal gyrus part of Wernicke's area | 0.035 |
|  |  |  |  | 43 - Subcentral area | 0.019 |
|  |  |  |  |  |  |
| CH13 | 63 | 4.667 | 36.667 | 6 - Pre-Motor and Supplementary Motor Cortex | 0.674 |
|  |  |  |  | 4 - Primary Motor Cortex | 0.165 |
|  |  |  |  | 43 - Subcentral area | 0.106 |
|  |  |  |  | 44 - pars opercularis, part of Broca's area | 0.051 |
|  |  |  |  | 3 - Primary Somatosensory Cortex | 0.004 |
|  |  |  |  |  |  |
| CH14 | 48.667 | 32.667 | 38.667 | 45 - pars triangularis Broca's area | 0.421 |
|  |  |  |  | 44 - pars opercularis, part of Broca's area | 0.237 |
|  |  |  |  | 9 - Dorsolateral prefrontal cortex | 0.204 |
|  |  |  |  | 46 - Dorsolateral prefrontal cortex | 0.138 |
|  |  |  |  |  |  |
| CH15 | 24 | 52 | 42.667 | 9 - Dorsolateral prefrontal cortex | 0.955 |
|  |  |  |  | 46 - Dorsolateral prefrontal cortex | 0.045 |
|  |  |  |  |  |  |
| CH16 | -5 | 58.667 | 41 | 9 - Dorsolateral prefrontal cortex | 0.85 |
|  |  |  |  | 10 - Frontopolar area | 0.15 |
|  |  |  |  |  |  |
| CH17 | -30.333 | 48.333 | 38.333 | 9 - Dorsolateral prefrontal cortex | 0.583 |
|  |  |  |  | 46 - Dorsolateral prefrontal cortex | 0.417 |
|  |  |  |  |  |  |
| CH18 | -48.667 | 29.667 | 37.333 | 45 - pars triangularis Broca's area | 0.474 |
|  |  |  |  | 44 - pars opercularis, part of Broca's area | 0.386 |
|  |  |  |  | 9 - Dorsolateral prefrontal cortex | 0.096 |
|  |  |  |  | 46 - Dorsolateral prefrontal cortex | 0.044 |
|  |  |  |  |  |  |
| CH19 | -61 | 5 | 34.667 | 6 - Pre-Motor and Supplementary Motor Cortex | 0.646 |
|  |  |  |  | 43 - Subcentral area | 0.139 |
|  |  |  |  | 4 - Primary Motor Cortex | 0.131 |
|  |  |  |  | 44 - pars opercularis, part of Broca's area | 0.077 |
|  |  |  |  | 3 - Primary Somatosensory Cortex | 0.007 |
|  |  |  |  |  |  |
| CH20 | -66 | -19.333 | 36.667 | 2 - Primary Somatosensory Cortex | 0.492 |
|  |  |  |  | 1 - Primary Somatosensory Cortex | 0.354 |
|  |  |  |  | 43 - Subcentral area | 0.131 |
|  |  |  |  | 3 - Primary Somatosensory Cortex | 0.023 |
|  |  |  |  |  |  |
| CH21 | -65.333 | -45 | 36.333 | 40 - Supramarginal gyrus part of Wernicke's area | 0.817 |
|  |  |  |  | 48 - Retrosubicular area | 0.157 |
|  |  |  |  | 22 - Superior Temporal Gyrus | 0.023 |
|  |  |  |  | 39 - Angular gyrus, part of Wernicke's area | 0.003 |
|  |  |  |  |  |  |
| CH22 | 71 | -35.667 | 17.667 | 22 - Superior Temporal Gyrus | 0.779 |
|  |  |  |  | 48 - Retrosubicular area | 0.118 |
|  |  |  |  | 40 - Supramarginal gyrus part of Wernicke's area | 0.078 |
|  |  |  |  | 2 - Primary Somatosensory Cortex | 0.025 |
|  |  |  |  |  |  |
| CH23 | 69 | -4 | 20 | 43 - Subcentral area | 0.777 |
|  |  |  |  | 22 - Superior Temporal Gyrus | 0.125 |
|  |  |  |  | 6 - Pre-Motor and Supplementary Motor Cortex | 0.05 |
|  |  |  |  | 48 - Retrosubicular area | 0.047 |
|  |  |  |  |  |  |
| CH24 | 60 | 24.667 | 22.667 | 45 - pars triangularis Broca's area | 0.617 |
|  |  |  |  | 44 - pars opercularis, part of Broca's area | 0.383 |
|  |  |  |  |  |  |
| CH25 | 41.667 | 50.667 | 28.667 | 46 - Dorsolateral prefrontal cortex | 0.756 |
|  |  |  |  | 45 - pars triangularis Broca's area | 0.244 |
|  |  |  |  |  |  |
| CH26 | 12.667 | 66 | 30.667 | 10 - Frontopolar area | 0.795 |
|  |  |  |  | 9 - Dorsolateral prefrontal cortex | 0.205 |
|  |  |  |  |  |  |
| CH27 | -19.333 | 62.667 | 29.667 | 10 - Frontopolar area | 0.563 |
|  |  |  |  | 9 - Dorsolateral prefrontal cortex | 0.219 |
|  |  |  |  | 46 - Dorsolateral prefrontal cortex | 0.219 |
|  |  |  |  |  |  |
| CH28 | -42.667 | 46.667 | 27.667 | 46 - Dorsolateral prefrontal cortex | 0.523 |
|  |  |  |  | 45 - pars triangularis Broca's area | 0.477 |
|  |  |  |  |  |  |
| CH29 | -56 | 25 | 25.667 | 45 - pars triangularis Broca's area | 0.592 |
|  |  |  |  | 44 - pars opercularis, part of Broca's area | 0.408 |
|  |  |  |  |  |  |
| CH30 | -65 | -1.333 | 25.667 | 43 - Subcentral area | 0.746 |
|  |  |  |  | 6 - Pre-Motor and Supplementary Motor Cortex | 0.228 |
|  |  |  |  | 4 - Primary Motor Cortex | 0.026 |
|  |  |  |  |  |  |
| CH31 | -69 | -29.333 | 23.667 | 2 - Primary Somatosensory Cortex | 0.419 |
|  |  |  |  | 22 - Superior Temporal Gyrus | 0.309 |
|  |  |  |  | 48 - Retrosubicular area | 0.165 |
|  |  |  |  | 42 - Primary and Auditory Association Cortex | 0.061 |
|  |  |  |  | 40 - Supramarginal gyrus part of Wernicke's area | 0.046 |
|  |  |  |  |  |  |
| CH32 | 71 | -46.333 | 2.667 | 21 - Middle Temporal gyrus | 0.459 |
|  |  |  |  | 22 - Superior Temporal Gyrus | 0.355 |
|  |  |  |  | 37 - Fusiform gyrus | 0.147 |
|  |  |  |  | 20 - Inferior Temporal gyrus | 0.039 |
|  |  |  |  |  |  |
| CH33 | 72 | -15.333 | 1.667 | 22 - Superior Temporal Gyrus | 0.556 |
|  |  |  |  | 21 - Middle Temporal gyrus | 0.444 |
|  |  |  |  |  |  |
| CH34 | 62.667 | 14.333 | 8.333 | 48 - Retrosubicular area | 0.414 |
|  |  |  |  | 6 - Pre-Motor and Supplementary Motor Cortex | 0.303 |
|  |  |  |  | 44 - pars opercularis, part of Broca's area | 0.228 |
|  |  |  |  | 45 - pars triangularis Broca's area | 0.052 |
|  |  |  |  | 38 - Temporopolar area | 0.003 |
|  |  |  |  |  |  |
| CH35 | 54 | 43 | 10 | 45 - pars triangularis Broca's area | 0.709 |
|  |  |  |  | 46 - Dorsolateral prefrontal cortex | 0.291 |
|  |  |  |  |  |  |
| CH36 | 28.667 | 67 | 16.667 | 10 - Frontopolar area | 0.927 |
|  |  |  |  | 46 - Dorsolateral prefrontal cortex | 0.073 |
|  |  |  |  |  |  |
| CH37 | -4.333 | 70 | 16 | 10 - Frontopolar area | 1 |
|  |  |  |  |  |  |
| CH38 | -34 | 61.333 | 17.333 | 46 - Dorsolateral prefrontal cortex | 0.522 |
|  |  |  |  | 10 - Frontopolar area | 0.478 |
|  |  |  |  |  |  |
| CH39 | -51.667 | 40.667 | 14.333 | 45 - pars triangularis Broca's area | 0.909 |
|  |  |  |  | 46 - Dorsolateral prefrontal cortex | 0.091 |
|  |  |  |  |  |  |
| CH40 | -60 | 17.333 | 14.333 | 44 - pars opercularis, part of Broca's area | 0.419 |
|  |  |  |  | 6 - Pre-Motor and Supplementary Motor Cortex | 0.268 |
|  |  |  |  | 45 - pars triangularis Broca's area | 0.217 |
|  |  |  |  | 48 - Retrosubicular area | 0.096 |
|  |  |  |  |  |  |
| CH41 | -67.667 | -10 | 11.667 | 22 - Superior Temporal Gyrus | 0.648 |
|  |  |  |  | 43 - Subcentral area | 0.217 |
|  |  |  |  | 48 - Retrosubicular area | 0.135 |
|  |  |  |  |  |  |
| CH42 | -70 | -41.333 | 8.667 | 22 - Superior Temporal Gyrus | 0.787 |
|  |  |  |  | 21 - Middle Temporal gyrus | 0.212 |
|  |  |  |  |  |  |
| CH43 | 73 | -26.667 | -11.667 | 21 - Middle Temporal gyrus | 0.853 |
|  |  |  |  | 20 - Inferior Temporal gyrus | 0.147 |
|  |  |  |  |  |  |
| CH44 | 66.333 | 1.667 | -11.333 | 21 - Middle Temporal gyrus | 0.849 |
|  |  |  |  | 38 - Temporopolar area | 0.123 |
|  |  |  |  | 48 - Retrosubicular area | 0.027 |
|  |  |  |  |  |  |
| CH45 | 57 | 34.333 | -4.667 | 45 - pars triangularis Broca's area | 0.554 |
|  |  |  |  | 38 - Temporopolar area | 0.208 |
|  |  |  |  | 47 - Inferior prefrontal gyrus | 0.147 |
|  |  |  |  | 46 - Dorsolateral prefrontal cortex | 0.091 |
|  |  |  |  |  |  |
| CH46 | 43.667 | 60.333 | -1.667 | 10 - Frontopolar area | 0.486 |
|  |  |  |  | 46 - Dorsolateral prefrontal cortex | 0.478 |
|  |  |  |  | 47 - Inferior prefrontal gyrus | 0.02 |
|  |  |  |  | 11 - Orbitofrontal area | 0.016 |
|  |  |  |  |  |  |
| CH47 | 12.333 | 74 | 2.667 | 10 - Frontopolar area | 0.848 |
|  |  |  |  | 11 - Orbitofrontal area | 0.152 |
|  |  |  |  |  |  |
| CH48 | -19.333 | 72 | 4.667 | 10 - Frontopolar area | 0.766 |
|  |  |  |  | 11 - Orbitofrontal area | 0.234 |
|  |  |  |  |  |  |
| CH49 | -44.333 | 55.667 | 3.333 | 46 - Dorsolateral prefrontal cortex | 0.759 |
|  |  |  |  | 10 - Frontopolar area | 0.241 |
|  |  |  |  |  |  |
| CH50 | -56 | 34.667 | 2.333 | 45 - pars triangularis Broca's area | 0.925 |
|  |  |  |  | 38 - Temporopolar area | 0.058 |
|  |  |  |  | 46 - Dorsolateral prefrontal cortex | 0.016 |
|  |  |  |  |  |  |
| CH51 | -62 | 3.667 | -1.333 | 48 - Retrosubicular area | 0.527 |
|  |  |  |  | 21 - Middle Temporal gyrus | 0.289 |
|  |  |  |  | 38 - Temporopolar area | 0.174 |
|  |  |  |  | 6 - Pre-Motor and Supplementary Motor Cortex | 0.01 |
|  |  |  |  |  |  |
| CH52 | -71 | -22.333 | -5.333 | 21 - Middle Temporal gyrus | 0.915 |
|  |  |  |  | 22 - Superior Temporal Gyrus | 0.085 |
